# Supplementary material for: Health Effects Associated With Electronic Cigarette Use: Automated Mining of Online Forums
Source: J Med Internet Res. 2020 Jan 3;22(1):e15684. doi: 10.2196/15684 (PMC6969389; doi:10.2196/15684)
Supplement: Multimedia Appendix 3 [file jmir_v22i1e15684_app3.docx]

Table 1: Listing of all symptoms not included in heat map

| System/Anatomical Region | Symptoms | Negative | Positive |
| --- | --- | --- | --- |
| Neurological System | Ocular headache | 1 (0.00028%) | 0 (0.00%) |
| Psychological symptom | 1 (0.00028%) | 0 (0.00%) |
| Spasmodic movement | 1 (0.00028%) | 0 (0.00%) |
| Death anxiety | 1 (0.00028%) | 0 (0.00%) |
| Feeling feverish | 1 (0.00028%) | 0 (0.00%) |
| Restless sleep | 1 (0.00028%) | 0 (0.00%) |
| Incoordination | 1 (0.00028%) | 0 (0.00%) |
| Partial seizure | 1 (0.00028%) | 0 (0.00%) |
| Death rattle | 0 (0.00%) | 1 (0.00028%) |
| Peripheral neuropathic pain | 1 (0.00028%) | 0 (0.00%) |
| Felt faint | 1 (0.00028%) | 0 (0.00%) |
| Increased nervousness | 1 (0.00028%) | 0 (0.00%) |
| Increased thirst | 1 (0.00028%) | 0 (0.00%) |
| System/Anatomical Region | Symptoms | Negative | Positive |
| Respiratory System | Whopping respiration | 1 (0.0005%) | 0 (0.00%) |
| Early morning cough | 0 (0.00%) | 0 (0.00%) |
| Grunting respiration | 1 (0.0005%) | 0 (0.00%) |
| Catarrh | 0 (0.00%) | 0 (0.00%) |
| Interrupted breathing | 0 (0.00%) | 0 (0.00%) |
| Hemoptysis | 1 (0.0005%) | 0 (0.00%) |
| Paroxysmal nocturnal dyspnea | 1 (0.0005%) | 0 (0.00%) |
| Respiration intermittent | 1 (0.0005%) | 0 (0.00%) |
| Labored breathing | 1 (0.0005%) | 0 (0.00%) |
| Chest pain on breathing | 1 (0.0005%) | 0 (0.00%) |
| System/Anatomical Region | Symptoms | Negative | Positive |
| Digestive System | Nausea and vomiting | 1 (0.00061%) | 0 (0.00%) |
| Abdominal discomfort | 1 (0.00061%) | 0 (0.00%) |
| Hematemesis | 1 (0.00061%) | 0 (0.00%) |
| Weight symptom | 1 (0.00061%) | 0 (0.00%) |
| Infantile diarrhea | 1 (0.00061%) | 0 (0.00%) |
| Abdominal tenderness | 1 (0.00061%) | 0 (0.00%) |
| Morning sickness | 0 (0.00%) | 0 (0.00%) |
| Morning nausea | 0 (0.00%) | 0 (0.00%) |
| Severe diarrhea | 1 (0.00061%) | 0 (0.00%) |
| Digestive symptom | 1 (0.00061%) | 0 (0.00%) |
| Flatulent dyspepsia | 1 (0.00061%) | 0 (0.00%) |
| System/Anatomical Region | Symptoms | Negative | Positive |
| Mouth and Throat | Oral hypoesthesia | 1 (0.00072%) | 0 (0.00%) |
| Sore lip | 1 (0.00072%) | 0 (0.00%) |
| Excessive thirst | 1 (0.00072%) | 0 (0.00%) |
| Change in voice | 1 (0.00072%) | 0 (0.00%) |
| Garlic breath | 1 (0.00072%) | 0 (0.00%) |
| System/Anatomical Region | Symptoms | Negative | Positive |
| Integumentary System | Warm skin | 1 (0.0012%) | 0 (0.00%) |
| Lamellar nail splitting | 1 (0.0012%) | 0 (0.00%) |
| Cushingoid facies | 1 (0.0012%) | 0 (0.00%) |
| Face acne | 1 (0.0012%) | 0 (0.00%) |
| Thick skin | 1 (0.0012%) | 0 (0.00%) |
| System/Anatomical Region | Symptoms | Negative | Positive |
| Muscular/Skeletal System | Hypokinetic | 1 (0.0016%) | 0 (0.00%) |
| Pain in wrist | 1 (0.0016%) | 0 (0.00%) |
| Hip pain | 0 (0.00%) | 0 (0.00%) |
| Charleyhorse | 1 (0.0016%) | 0 (0.00%) |
| Tenalgia | 1 (0.0016%) | 0 (0.00%) |
| Pain in finger | 1 (0.0016%) | 0 (0.00%) |
| Myokymia | 1 (0.0016%) | 0 (0.00%) |
| Mechanical pain | 1 (0.0016%) | 0 (0.00%) |
| Involuntary movement symptom | 1 (0.0016%) | 0 (0.00%) |
| Joint stiffness | 1 (0.0016%) | 0 (0.00%) |
| System/Anatomical Region | Symptoms | Negative | Positive |
| Chest | Intolerant of cold |  |  |
| Swallowing painful |  |  |
| Atypical chest pain |  |  |
| Radiating chest pain |  |  |
| Right sided chest pain |  |  |
| System/Anatomical Region | Symptoms | Negative | Positive |
| Immune System | Intolerant of cold | 1 (0.0028%) | 0 (0.00%) |
| System/Anatomical Region | Symptoms | Negative | Positive |
| Sensory System | Auditory hallucinations | 1 (0.0038%) | 0 (0.00%) |
| Photophobia | 1 (0.0038%) | 0 (0.00%) |
| Loss of sense of smell | 1 (0.0038%) | 0 (0.00%) |
| Photopsia | 1 (0.0038%) | 0 (0.00%) |
|  | Ear symptom | 1 (0.0038%) | 0 (0.00%) |
|  | Discharge from eye | 1 (0.0038%) | 0 (0.00%) |
|  | Rolling of eyes | 1 (0.0038%) | 0 (0.00%) |
|  | Eye swelling | 1 (0.0038%) | 0 (0.00%) |
| System/Anatomical Region | Symptoms | Negative | Positive |
| Urogenital System | Polyuria | 1 (0.014%) | 0 (0.00%) |
| Menopausal problem | 1 (0.014%) | 0 (0.00%) |
| System/Anatomical Region | Symptoms | Negative | Positive |
| Circulatory System | Abnormal heart beat | 1 (0.02%) | 0 (0.00%) |
| Widened pulse pressure | 1 (0.02%) | 0 (0.00%) |
